# Supplementary material for: Evaluation of analytical performance of a new high-sensitivity immunoassay for cardiac troponin I
Source: publisher site journal article supplement (doi:10.1515/cclm-2017-0387), 2017-09-23
Supplement: Supplementary file 1 [file Suppl_Fig_Caption.docx]

**Supplemental File 1** Linear regression between log-transformed cTnI concentrations, measured by Access AccuTnI+3 (X-axis) and hs-cTnI methods (Y-axis).

For this regression analysis, 257 heparinized plasma samples (grey circles) of healthy subjects and patient with cardiac disease (including some patients with acute myocardial infarction) and 31 QC samples were evaluated (black circles). The grey zone around the linear regression indicates 95% prediction intervals. The calculated linear regression is also reported in the Figure.

**Supplemental File 2** Linear regression between log-transformed cTnI concentrations, measured by the ARCHITECT hs-cTnI (X-axis) and Access hs-cTnI methods (Y-axis). For this regression analysis, 287 heparinized plasma samples (grey circles) of healthy subjects and patients with cardiac disease (including some patients with acute myocardial infarction) and 31 QC samples were evaluated (black circles). The grey zone around the linear regression indicates 95% prediction intervals. The calculated linear regression is also reported in the Figure.
